# Supplementary material
Source: ML conference proceedings conference paper supplement (https://openreview.net/forum?id=dWhS55KGSKy)
Supplement: supplementary_material [file attachment]

## AUTHOR CONTRIBUTIONS

If you'd like to, you may include a section for author contributions as is done in many journals. This is optional and at the discretion of the authors.

## ACKNOWLEDGMENTS

Use unnumbered third level headings for the acknowledgments. All acknowledgments, including those to funding agencies, go at the end of the paper.

## A APPENDIX

### A.1 KALMAN FILTER

For neural networks, the model of interest

$$\begin{cases} \theta_t = \theta_{t-1} = \mathbf{w}, \\ y_t = h(\theta_t, x_t) + \eta_t, \quad \eta_t \sim \mathcal{N}(0, R_t), \end{cases} \quad (1)$$

is formulated in stochastic language as an EKF problem targeting on  $\hat{\theta}_t$ , where  $\mathbf{w}$  is the vector of all trainable parameters in the network  $h(\cdot, \cdot)$ ,  $\{(x_t, y_t)\}_{t \in \mathbb{N}}$  are pairs of feature and label,  $\{y_t\}_{t \in \mathbb{N}}$  can also be seen as measurements of EKF,  $\{\eta_t\}_{t \in \mathbb{N}}$  are noise terms subject to normal distribution with mean 0 and variances  $\{R_t\}_{t \in \mathbb{N}}$  correspondingly, and  $\forall t \in \mathbb{N}$ ,  $\hat{\theta}_{t|t-1} := \mathbb{E}[\theta_t | y_{t-1}, y_{t-2}, \dots, y_1]$ . With fixed  $\theta_t$  and bounded  $x_t$ ,  $h(\theta_t, x_t)$  will be approximated well by its linearization at  $\hat{\theta}_{t|t-1}$ , just omitting a term  $\mathcal{O}((\theta_t - \hat{\theta}_{t|t-1})^2)$ .

$$\begin{aligned} y_t &\approx h(\hat{\theta}_{t|t-1}, x_t) + \mathbf{H}_t^\top (\theta_t - \hat{\theta}_{t|t-1}) + \eta_t \\ \mathbf{H}_t &= \left. \frac{\partial h(\theta, x_t)}{\partial \theta} \right|_{\theta = \hat{\theta}_{t|t-1}} \end{aligned} \quad (2)$$

If set  $m_t = y_t - h(\hat{\theta}_{t|t-1}, x_t) + \mathbf{H}_t^\top \hat{\theta}_{t|t-1}$  and rewrite equation 1 the following KF problem

$$\begin{cases} \theta_t = \theta_{t-1} = \mathbf{w}, \\ m_t \approx \mathbf{H}_t^\top \theta_t + \eta_t. \end{cases} \quad (3)$$

$$(4)$$

At the beginning of training, the estimator  $\hat{\theta}_{t|t-1}$  is far away from  $\mathbf{w}$ , so less attention should be paid to those data fed to the network at an earlier stage of training than those at later stage. Through timing a factor  $\alpha_t := \prod_{i=1}^t \lambda_i^{-1/2}$  and  $\alpha_0 := 1$ , where  $0 < \lambda_i \leq 1$  and  $\lambda_i \rightarrow 1$ , the last problem enjoys the better variant as below

$$\begin{cases} \theta_t = \lambda_t^{-1/2} \theta_{t-1}, \quad \theta_1 = \mathbf{w} \\ \tilde{m}_t = \alpha_t m_t \approx \mathbf{H}_t^\top \theta_t + \alpha_t \eta_t = \mathbf{H}_t^\top \theta_t + \tilde{\eta}_t, \end{cases} \quad (5)$$

where  $\lambda_t$  is called memory factor. The greater  $\lambda_t$  is, the more weight, or say attention, is paid to previous data. According to basic KF theory [Haykin & Haykin \(2001\)](#), we obtain

$$\begin{aligned} \mathbf{a}_t &= \lambda_t^{-1} \mathbf{H}_t^\top \mathbf{P}_{t-1} \mathbf{H}_t + \alpha_t^2 R_t = \mathbb{E}[\tilde{\epsilon}_t^2], \\ \mathbf{K}_t &= \lambda_t^{-1} \mathbf{P}_{t-1} \mathbf{H}_t^\top \mathbf{a}_t^{-1}, \\ \mathbf{P}_t &= (\mathbf{I} - \mathbf{K}_t \mathbf{H}_t) \lambda_t^{-1} \mathbf{P}_{t-1}, \\ \hat{\theta}_t &= \hat{\theta}_{t|t-1} + \mathbf{K}_t \tilde{\epsilon}_t, \\ \tilde{\epsilon}_t &= \tilde{m}_t - \mathbf{H}_t^\top \hat{\theta}_{t|t-1} = \alpha_t (y_t - h(\alpha_t^{-1} \hat{\theta}_{t|t-1}, x_t)). \end{aligned}$$

Finally, we recover the estimator of  $w$  via that of  $\theta$  divided by the factor  $\alpha_t$ , define  $\forall t \in \mathbb{N}$ ,  $\hat{w}_{t|t-1} := \alpha_t^{-1} \hat{\theta}_{t|t-1}$ ,  $w_t := \alpha_t^{-1} \hat{\theta}_t$ , find  $\hat{w}_{t|t-1} = w_{t-1}$ , and then get our weights updating strategy

$$\begin{aligned} \epsilon_t &= y_t - h(w_{t-1}, x_t), \\ w_t &= w_{t-1} + \mathbf{K}_t \epsilon_t. \end{aligned}$$
